# Supplementary material for: Safe and effective profile of the VSTENT bioresorbable polymer sirolimus-eluting stent in the treatment of patients with de novo coronary artery lesions: a prospective, cohort, multicenter study
Source: PubMed Central journal article supplement — Cardiovasc Diagn Ther. 2023 May 18;13(3):474–86. doi: 10.21037/cdt-22-522 (PMC10315421; doi:10.21037/cdt-22-522), 2023-05-18
Supplement: cdt-13-03-474-dss.pdf [file cdt-13-03-474-dss.pdf]

| Data Sharing Statement |                                                                                                                                                    |                                                                                                                                             |
|------------------------|----------------------------------------------------------------------------------------------------------------------------------------------------|---------------------------------------------------------------------------------------------------------------------------------------------|
| Article Info           | <a href="https://dx.doi.org/10.21037/cdt-22-522">https://dx.doi.org/10.21037/cdt-22-522</a>                                                        |                                                                                                                                             |
| Item                   | Question                                                                                                                                           | Authors' Response<br>(place “-” if not applicable)                                                                                          |
| 1                      | Would you like to share data collected for your study to others?                                                                                   | Yes                                                                                                                                         |
| 2                      | If not, would you like to share the reason for your decision?                                                                                      |                                                                                                                                             |
| 3                      | What data in particular will be shared?                                                                                                            | Patient clinical characteristics, procedural details and clinical outcomes.                                                                 |
| 4                      | Any other documents will be share? Such as study protocol, statistical analysis plan, informed consent form, clinical study report, analytic code. | The study protocol, statistical analysis plan, informed consent form, clinical study report, analytic code will also be shared if requested |
| 5                      | When will data availability begin?                                                                                                                 | Since publication                                                                                                                           |
| 6                      | When will data availability end?                                                                                                                   | December 2023                                                                                                                               |
| 7                      | To whom will you share the data?                                                                                                                   | Physicians and scientists who are interested in this paper                                                                                  |
| 8                      | For what type of analysis or purpose?                                                                                                              | To reproduce trial or for learning purpose.                                                                                                 |
| 9                      | How or where can the data/documents be obtained?                                                                                                   | By contacting the corresponding author                                                                                                      |
| 10                     | Any other restrictions?                                                                                                                            | No.                                                                                                                                         |
